# Supplementary material for: Keggin polyanion and copper cluster based coordination polymer towards model for complex nanosystem
Source: Royal Society of Chemistry journal article supplement (doi:10.1039/c2dt30284e), 2012-01-01
Supplement: c2dt30284e.pdf [file c2dt30284e.pdf]

# Keggin polyanions and copper clusters based coordination polymer towards model for complex nanosystem

## Supporting Information

**Materials and general methods.** All chemicals were commercially purchased and used as supplied. Elemental analyses of C, H, and N were performed using an EA1110 elemental analyzer. The IR spectrum was recorded in the range 4000-400 $\text{cm}^{-1}$  on a Nicolet 360 spectrometer with a pressed KBr pellet. The TG-DTA analysis was carried out by Universal Analysis 2000 thermogravimetric analyzer (TGA) in  $\text{N}_2$  with a heating rate of 10  $^\circ\text{C}$  /min. The powder X-ray diffraction (PXRD) data was collected on a X'Pert-ProMPD (Holand) D/max- $\gamma$ A X-ray diffractometer with Cu  $K\alpha$  radiation in a flat plate geometry. Crystal data were collected on a Bruker X8 APEX II-CCD single crystal X-ray diffractometer with Cu  $K\alpha$  radiation ( $\lambda = 0.71073\text{\AA}$ ).

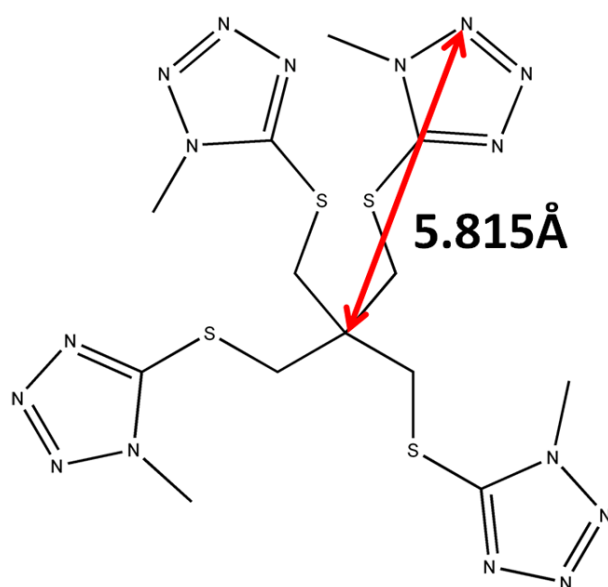

**Scheme S1.** The bpbb ligand used in this report.

**Table S1.** Crystal Data and Structural Refinements for FUNSOM-1 and FUNSOM-2.

|                | FUNSOM-1                                                                                            | FUNSOM-2                                                                                    |
|----------------|-----------------------------------------------------------------------------------------------------|---------------------------------------------------------------------------------------------|
| formula        | $\text{C}_{26}\text{Cu}_4\text{S}_8\text{N}_{32}\text{H}_{40}\text{PMo}_{12}\text{O}_{40}\text{Cl}$ | $\text{C}_{26}\text{Cu}_4\text{S}_8\text{N}_{32}\text{H}_{44}\text{SiMo}_{12}\text{O}_{44}$ |
| <i>F</i> w     | 3169.24                                                                                             | 3198.94                                                                                     |
| crystal system | tetragonal                                                                                          | tetragonal                                                                                  |
| space group    | P4nc                                                                                                | I-42d                                                                                       |
| <i>a</i> (Å)   | 14.6513(5)                                                                                          | 20.3235(14)                                                                                 |
| <i>b</i> (Å)   | 14.6513(5)                                                                                          | 20.3235(14)                                                                                 |
| <i>c</i> (Å)   | 19.1456(15)                                                                                         | 39.008(6)                                                                                   |
| $\alpha$ (deg) | 90                                                                                                  | 90                                                                                          |
| $\beta$ (deg)  | 90                                                                                                  | 90                                                                                          |
| $\gamma$ (deg) | 90                                                                                                  | 90                                                                                          |

|                             |           |          |
|-----------------------------|-----------|----------|
| $V$ (Å <sup>3</sup> )       | 4109.8(4) | 16112(3) |
| $Z$                         | 2         | 8        |
| $D_c$ (g/cm <sup>3</sup> )  | 2.561     | 2.637    |
| $\mu$ (mm <sup>-1</sup> )   | 3.130     | 3.161    |
| $F(000)$                    | 3040.0    | 12304.0  |
| colld reflns                | 14153     | 28928    |
| unique reflns               | 3601      | 6894     |
| obsd reflns                 | 3222      | 6804     |
| no. of param                | 293       | 594      |
| $R_{int}$                   | 0.027     | 0.0304   |
| GOF                         | 1.308     | 1.155    |
| $R1^a$ [ $I > 2\sigma(I)$ ] | 0.046     | 0.099    |
| $wR2^b$ (all data)          | 0.1249    | 0.2164   |

$$^aR1 = \sum ||F_o| - |F_c|| / \sum |F_o|; ^b wR2 = \sum [w(F_o^2 - F_c^2)^2] / \sum [w(F_o^2)^2]^{1/2}.$$

**Table S2.** Selected bond distances (Å) and angles (°) for FUNSOM-1 and FUNSOM-2.

| FUNSOM-1           |            |                    |            |
|--------------------|------------|--------------------|------------|
| Cu(1)-N(1)         | 1.988(8)   | Cl(1)-Cu(1)#2      | 2.4752(13) |
| Cu(1)-N(5)         | 2.018(7)   | Cl(1)-Cu(1)#3      | 2.4752(13) |
| Cu(1)-N(6)#2       | 2.072(8)   | Cl(1)-Cu(1)#1      | 2.4752(13) |
| Cu(1)-Cl(1)        | 2.4752(13) |                    |            |
| N(1)-Cu(1)-N(5)    | 124.0(3)   | N(1)-Cu(1)-Cl(1)   | 103.4(3)   |
| N(1)-Cu(1)-N(6)#2  | 115.3(3)   | N(5)-Cu(1)-Cl(1)   | 100.9(2)   |
| N(5)-Cu(1)-N(6)#2  | 111.0(3)   | N(6)#2-Cu(1)-Cl(1) | 96.3(2)    |
| FUNSOM-2           |            |                    |            |
| Cu(1)-N(5)         | 1.986(17)  | Cu(2)-N(13)        | 1.932(18)  |
| Cu(1)-N(1)         | 2.005(18)  | Cu(2)-N(9)         | 1.96(2)    |
| Cu(1)-N(6)#1       | 2.103(17)  | Cu(2)-N(2)         | 2.064(19)  |
| Cu(1)-O(1W)        | 2.378(17)  | Cu(2)-O(1W)        | 2.288(16)  |
| N(5)-Cu(1)-N(1)    | 131.8(7)   | N(13)-Cu(2)-N(9)   | 129.6(9)   |
| N(5)-Cu(1)-N(6)#1  | 97.5(7)    | N(13)-Cu(2)-N(2)   | 114.4(8)   |
| N(1)-Cu(1)-N(6)#1  | 127.1(7)   | N(9)-Cu(2)-N(2)    | 113.4(8)   |
| N(5)-Cu(1)-O(1W)   | 117.9(6)   | N(13)-Cu(2)-O(1W)  | 104.7(7)   |
| N(1)-Cu(1)-O(1W)   | 87.4(6)    | N(9)-Cu(2)-O(1W)   | 98.2(7)    |
| N(6)#1-Cu(1)-O(1W) | 84.1(6)    | N(2)-Cu(2)-O(1W)   | 80.3(6)    |

Symmetry code: for 1: #1 -y+1, x, z; #2 y, -x+1, z; #3 -x+1, -y+1, z; for 2: #1 -x+1/2, y, -z+7/4.

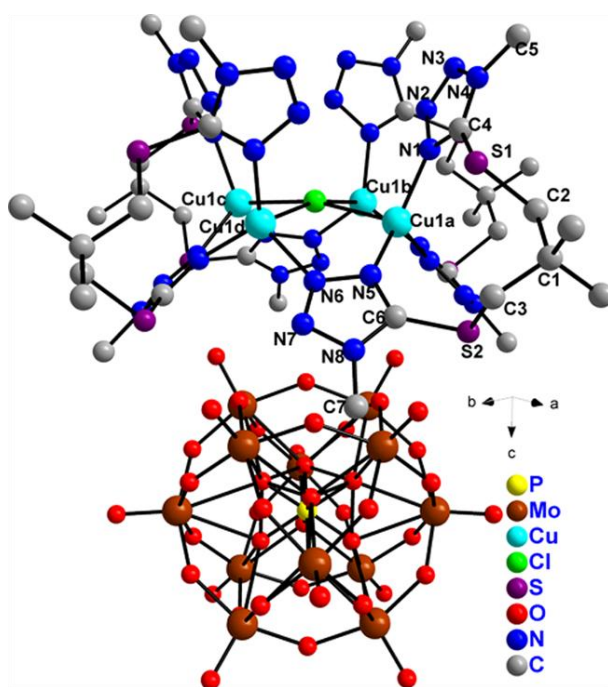

**Fig. S1.** Ball-stick view of the asymmetric unit of FUNSOM-1. All H atoms are omitted for clarity.

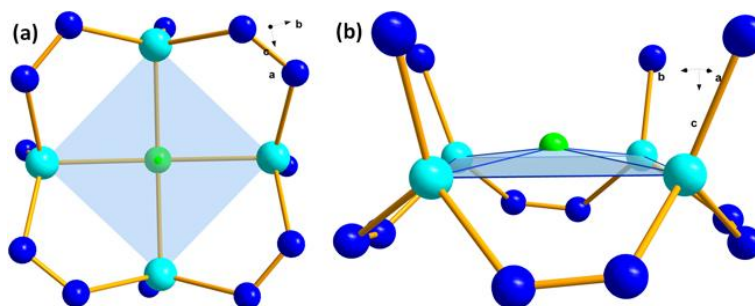

**Fig. S2.** (a) Top view of the coordination mode of closed  $\text{Cu}_4\text{Cl}$  subunit in FUNSOM-1. (b) The side view of the  $\text{Cu}_4\text{Cl}$  subunit with the centre  $\mu_4\text{-Cl}$  atom residing at the vertex of the tetrahedron.

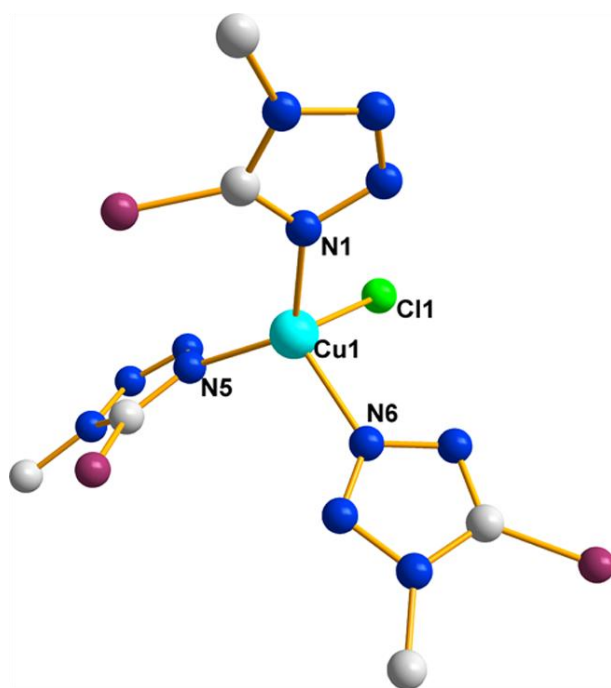

**Fig. S3.** The coordination detail of Cu1 in FUNSOM-1.

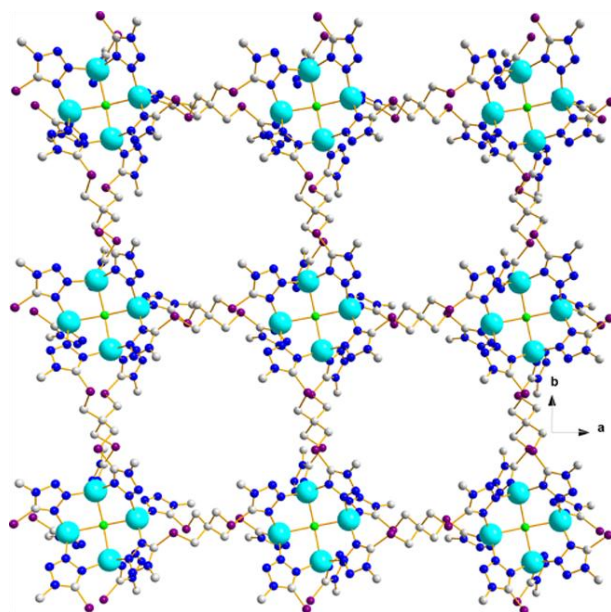

**Fig. S4.** Details view of the grid-like layer in FUNSOM-1.

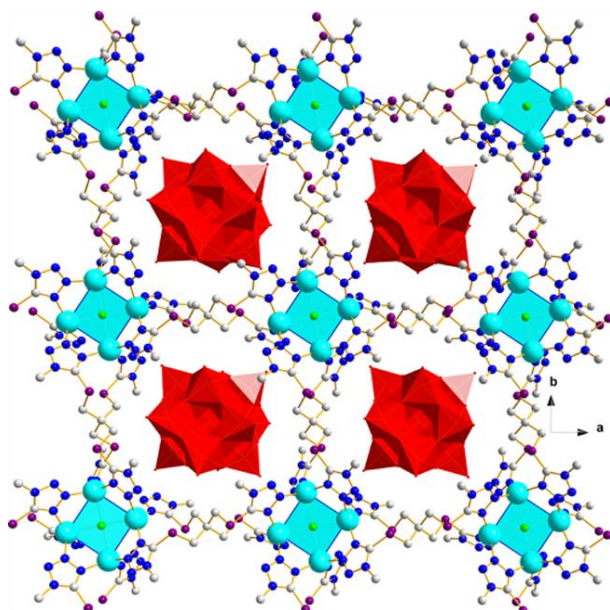

**Fig. S5.** The relationships between closed Cu<sub>4</sub>Cl(C<sub>2</sub>H<sub>3</sub>N<sub>4</sub>S)<sub>8</sub> clusters (blue) and [PMo<sub>12</sub>O<sub>40</sub>]<sup>3-</sup> anions (red) in FUNSOM-1.

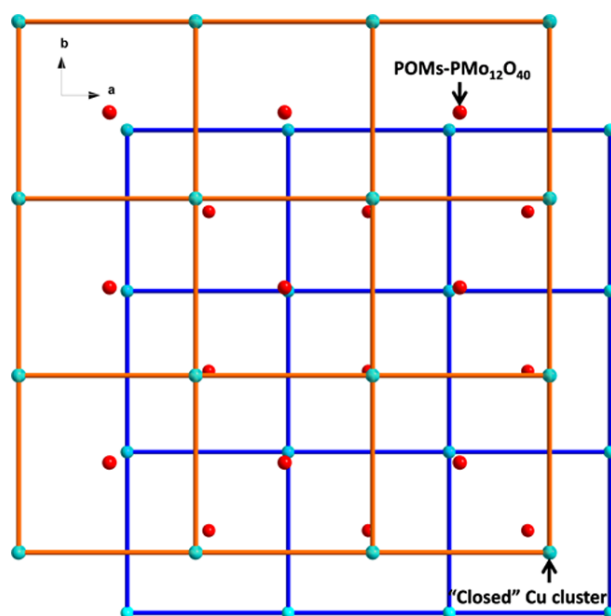

**Fig. S6.** Two adjacent grid-like layers (blue and yellow) are stagger-packed in FUNSOM-1. The [PMo<sub>12</sub>O<sub>40</sub>]<sup>3-</sup> anions (red) are in the centre of the grids.

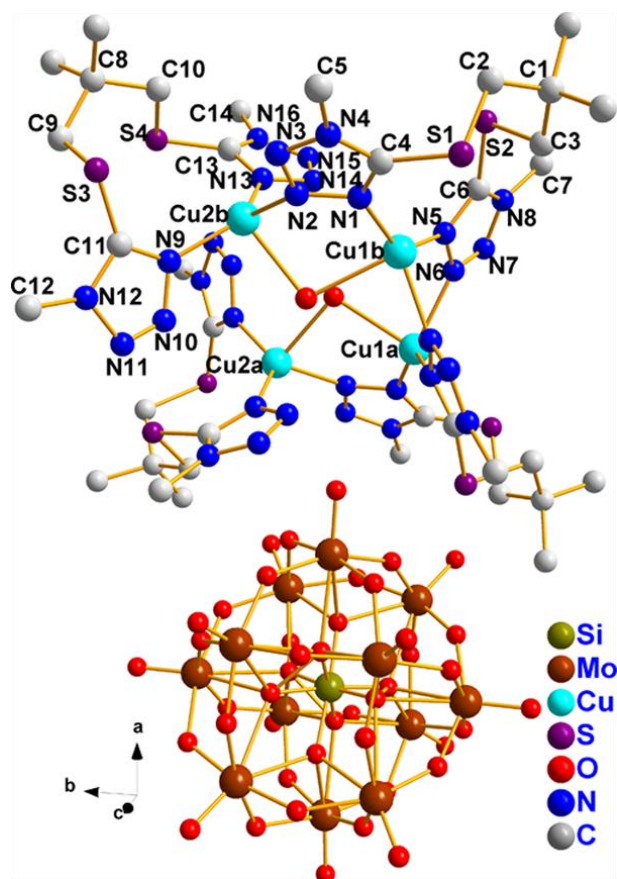

**Fig. S7.** Ball-stick view of the asymmetric unit of FUNSOM-2. All H atoms are omitted for clarity.

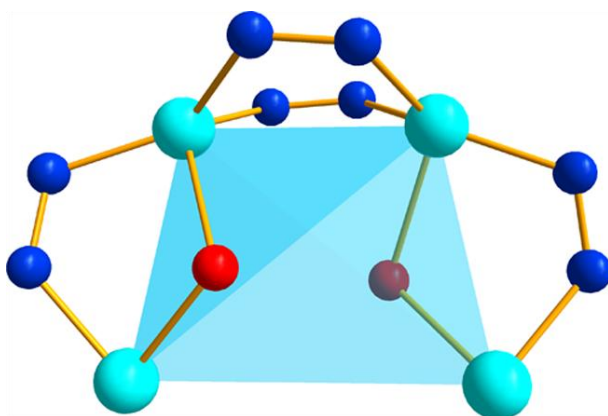

**Fig. S8.** The coordination mode of open  $\text{Cu}_4(\text{H}_2\text{O})_2$  subunit in FUNSOM-2.

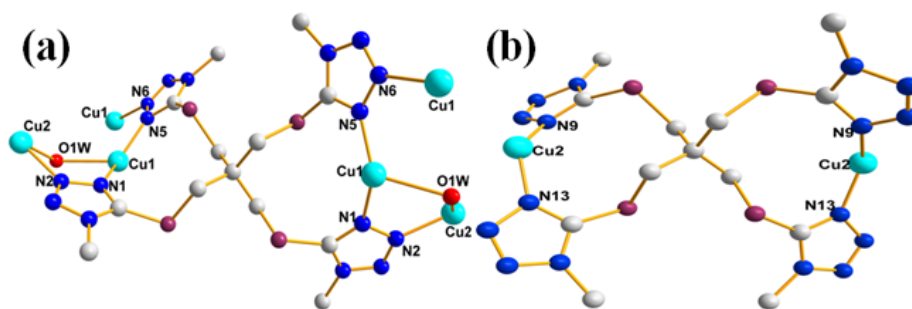

**Fig. S9.** The multiplex coordination modes of bpbb ligand in FUNSOM-2 (a) bpbb<sup>1</sup> (b) bpbb<sup>2</sup>.

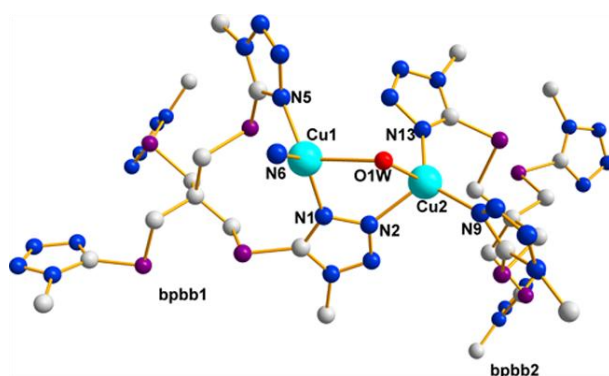

**Fig. S10.** The coordination details of Cu1 and Cu2 in FUNSOM-2.

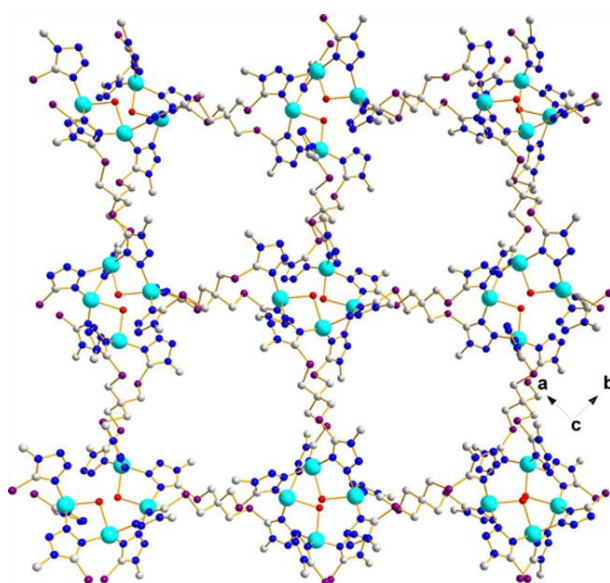

**Fig. S11.** Details view of the grid-like layer in FUNSOM-2.

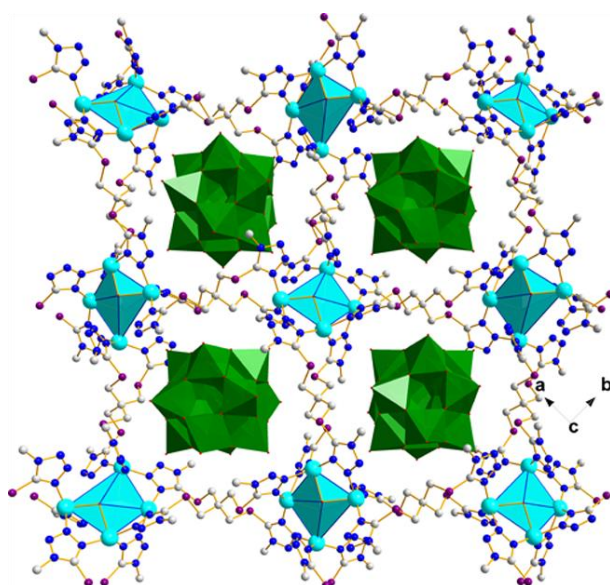

**Fig. S12.** The relationships between open  $\text{Cu}_4(\text{H}_2\text{O})_2(\text{C}_2\text{H}_3\text{N}_4\text{S})_8$  clusters (blue) and  $[\text{SiMo}_{12}\text{O}_{40}]^{4-}$  clusters (green).

anions (green) in FUNSOM-2.

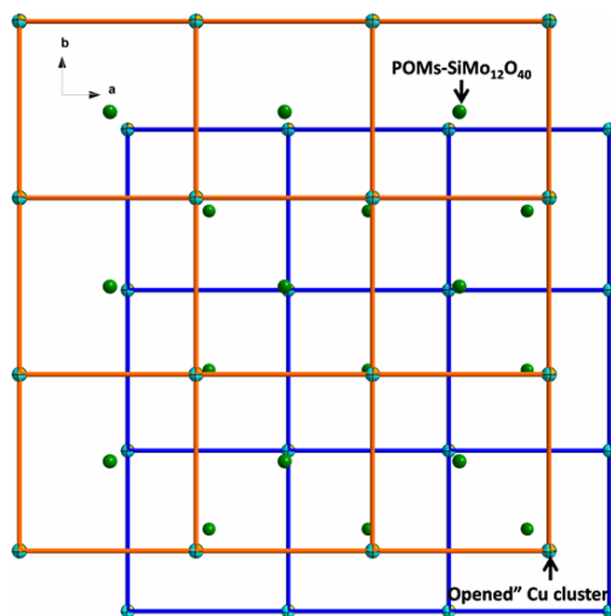

**Fig. S13.** Two adjacent grid-like layers (blue and yellow) are stagger-packed in FUNSOM-2. The  $[\text{SiMo}_{12}\text{O}_{40}]^{4-}$  anions (green) are in the centre of the grids.

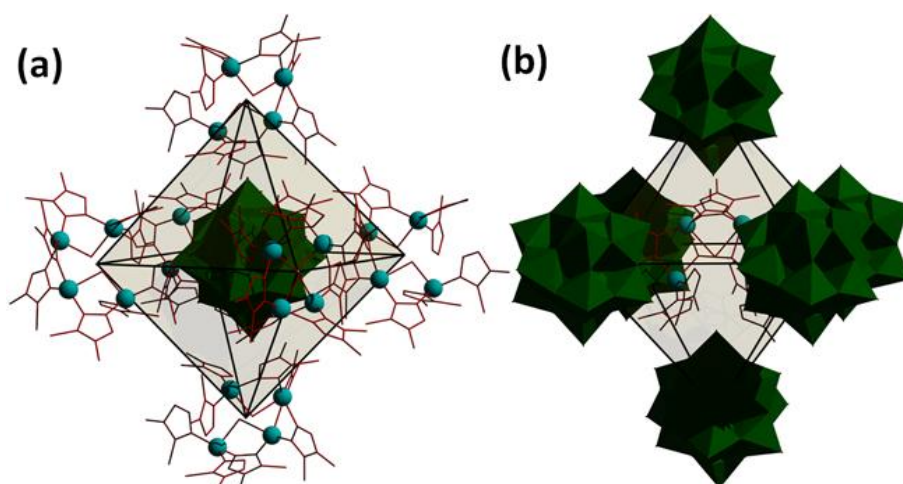

**Fig. S14.** The arrangement of FUNSOM-2 between  $\text{Cu}_4(\text{H}_2\text{O})_2(\text{C}_2\text{H}_3\text{N}_4\text{S})_8$  nanoclusters and  $[\text{SiMo}_{12}\text{O}_{40}]^{4-}$  anions: (a) one  $[\text{SiMo}_{12}\text{O}_{40}]^{4-}$  anion is surrounded by six  $\text{Cu}_4(\text{H}_2\text{O})_2(\text{C}_2\text{H}_3\text{N}_4\text{S})_8$  nanoclusters; (b) one  $\text{Cu}_4(\text{H}_2\text{O})_2(\text{C}_2\text{H}_3\text{N}_4\text{S})_8$  nanocluster is surrounded by six  $[\text{SiMo}_{12}\text{O}_{40}]^{4-}$  anions.



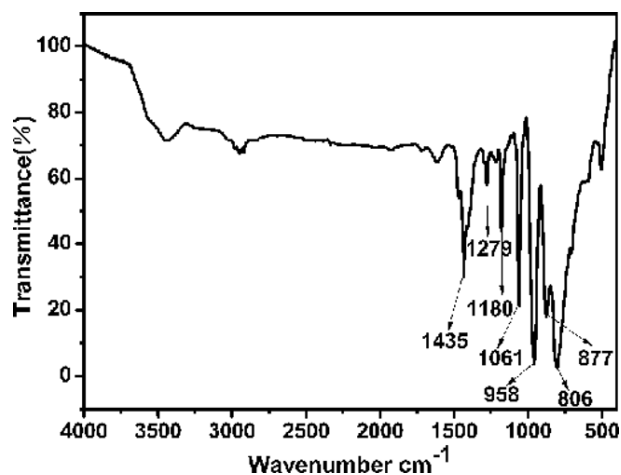

**Fig. S15.** The IR spectrum of FUNSOM-1 exhibits four characteristic asymmetric vibrations resulting from the  $[\text{PMo}_{12}\text{O}_{40}]^{3-}$  polyanion. The characteristic bands at 806, 877, 958, and 1061  $\text{cm}^{-1}$  are attributed to  $\nu(\text{Mo-Ot})$ ,  $\nu(\text{Mo-Ob-Mo})$ ,  $\nu(\text{Mo-Oc-Mo})$  and  $\nu(\text{P-O})$ , respectively. The bands in the range of 1171–1618  $\text{cm}^{-1}$  are assigned to the vibrations of bpbb ligands.

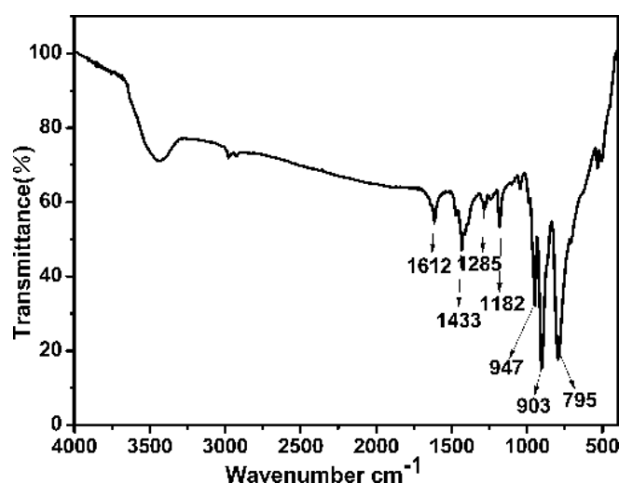

**Fig. S16.** The IR spectrum of FUNSOM-2 exhibits four characteristic asymmetric vibrations resulting from the  $[\text{SiMo}_{12}\text{O}_{40}]^{4-}$  polyanion. The characteristic bands at 795, 903, and 947  $\text{cm}^{-1}$  are attributed to  $\nu(\text{Mo-Ot})$ ,  $\nu(\text{Mo-Ob-Mo})$ ,  $\nu(\text{Mo-Oc-Mo})$ , and  $\nu(\text{Si-O})$ , respectively. The bands in the range of 1176–1620  $\text{cm}^{-1}$  are assigned to the vibrations of bpbb ligands.

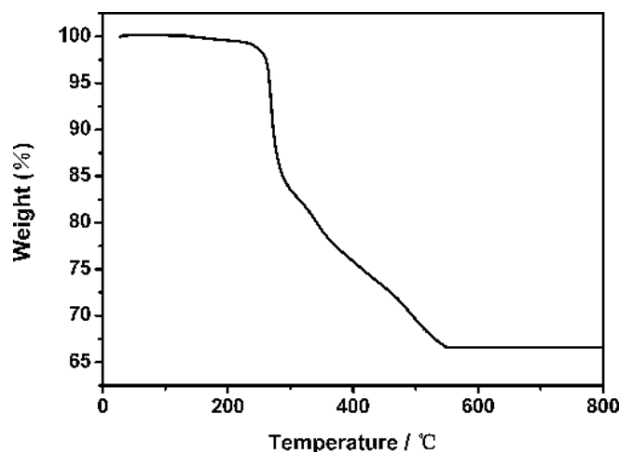

**Fig. S17.** TG experiments of FUNSOM-1 were performed under N<sub>2</sub> atmosphere with a heating rate of 10 °C/min in the temperature range of 0-1000 °C. In the TG curves, the weight loss of 33.04% (calc. 33.32%) for FUNSOM-1 from 250 to 550 °C corresponds to the loss of bpbb molecules.

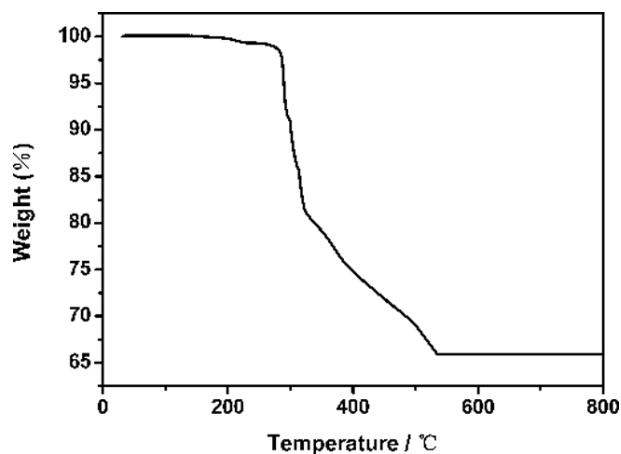

**Fig. S18.** TG experiments of FUNSOM-2 were performed under N<sub>2</sub> atmosphere with a heating rate of 10 °C/min in the temperature range of 0-1000 °C. The TG curve indicates that water molecules are eliminated from the network (calcd 0.90%; found 1.13%) when the temperature is increased from room temperature to about 250 °C, after which removal of the organic components (~280 °C) occurred. The total weight loss was consistent with the calculated values (calcd 34.15%, found 33.98%).

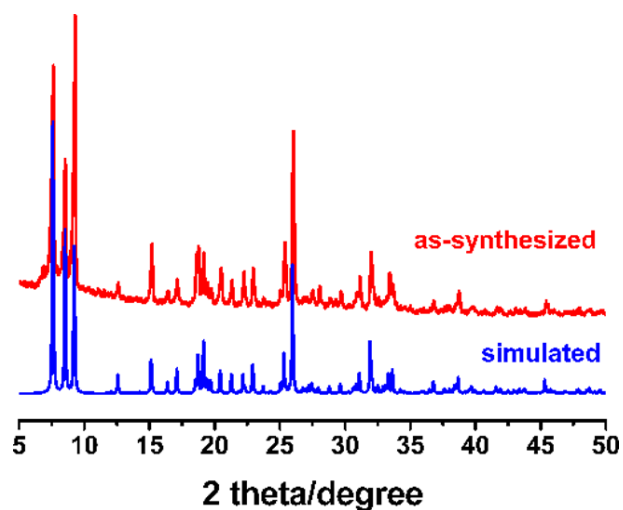

**Fig. S19.** Experimental XRD patterns of FUNSOM-1 exposed in air (red) and simulation patterns of FUNSOM-1 (blue).

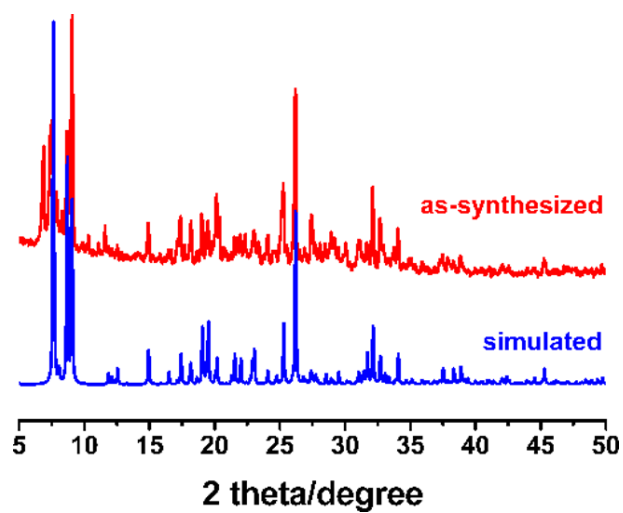

**Fig. S20.** Experimental XRD patterns of FUNSOM-2 exposed in air (red) and simulation patterns of FUNSOM-2 (blue).
